# Supplementary material
Source: publisher site journal article supplement (https://www.spandidos-publications.com/470/downloadSupplementary)
Supplement: Supplementary file 1 [file downloadSupplementary]

## Sheet: RegulatedProteins
Table SII. Differentially expressed proteins n the thorcic spinal cord between I/R group and sham group in rats.
Accession	Gene	Name	R1					R2					R3					Average	SD
			Total	%Cov	Peptides(95%)	H:L	PVal H:L	Total	%Cov	Peptides(95%)	H:L	PVal H:L	Total	%Cov	Peptides(95%)	H:L	PVal H:L
tr|A0A096MKB4|A0A096MKB4_RAT	Fry	FRY microtubule-binding protein (Fragment) OS=Rattus norvegicus GN=Fry PE=1 SV=1	2.41	12.12	2	0.20794	0.4689	6.43	17.12	6	0.0379059	0.421634	3.03	16.02	2	0.0665857	0	0.104144	0.0910266
tr|A0A0G2K0S1|A0A0G2K0S1_RAT	Calcoco1	Calcium-binding and coiled-coil domain-containing protein 1 OS=Rattus norvegicus GN=Calcoco1 PE=1 SV=1	5.65	34.41	4	0.263328	0.223604	4.39	30.49	2	0.107813	0.399261	6.46	31.33	3	0.112309	0.388731	0.16115	0.0885174
tr|A0A0H2UHM7|A0A0H2UHM7_RAT	LOC100909441	Tubulin alpha chain OS=Rattus norvegicus GN=LOC100909441 PE=3 SV=1	52.81	62.28	27	0.415521	0	58.08	62.28	31	0.0315764	0	57.47	68.08	32	0.0571496	0	0.168082	0.214669
tr|F1LPG9|F1LPG9_RAT	Washc2c	WASH complex subunit 2C OS=Rattus norvegicus GN=Washc2c PE=1 SV=2	15.2	20.48	8	0.131628	0.0367872	12.06	19.73	7	0.26638	0.282018	15.68	28.77	8	0.187091	0.0600739	0.195033	0.0677258
sp|Q68FW7|SYTM_RAT	Tars2	Threonine--tRNA ligase, mitochondrial OS=Rattus norvegicus GN=Tars2 PE=2 SV=1	2.74	22.41	2	0.298299	0.299377	6.71	26	3	0.0985109	0.386285	5.33	24.9	3	0.211177	0.253046	0.202662	0.100166
tr|A0A0A0MXX5|A0A0A0MXX5_RAT	Bdh2	3-hydroxybutyrate dehydrogenase type 2 OS=Rattus norvegicus GN=Bdh2 PE=1 SV=1	8.11	29.02	4	0.575801	0.355471	6.68	32.55	4	0.227418	0.479697	6.81	32.55	4	0.391096	0.302866	0.398105	0.174297
tr|D4A3T0|D4A3T0_RAT	Sos1	SOS Ras/Rac guanine nucleotide exchange factor 1 OS=Rattus norvegicus GN=Sos1 PE=1 SV=2	5.33	27.67	4	0.697948	0.360674	6.95	26.08	4	0.245386	0.327419	11.13	29.95	7	0.424997	0.391589	0.45611	0.22788
tr|G3V6A8|G3V6A8_RAT	Golgb1	Golgi autoantigen, golgin subfamily b, macrogolgin 1, isoform CRA_c OS=Rattus norvegicus GN=Golgb1 PE=1 SV=1	2.32	28.02	2	0.345452	0.0677692	1.73	27.64	5	0.367652	0	7.69	26.92	7	0.669472	0.174464	0.460859	0.181005
tr|D3ZXY2|D3ZXY2_RAT	Pdzd8	PDZ domain containing 8 (Predicted) OS=Rattus norvegicus GN=Pdzd8 PE=1 SV=1	5.92	19.27	4	0.0840999	0.206838	4.62	26.13	3	0.473434	0.181145	4.88	23	4	0.844558	0.440555	0.467364	0.380265
sp|P40112|PSB3_RAT	Psmb3	Proteasome subunit beta type-3 OS=Rattus norvegicus GN=Psmb3 PE=1 SV=1	5.17	43.41	3	0.413072	0.347687	7.29	38.54	4	0.509721	0.200874	8.13	35.12	4	0.505909	0.340135	0.476234	0.0547332
tr|Q6AY48|Q6AY48_RAT	Pcbp3	Poly(rC)-binding protein 3 OS=Rattus norvegicus GN=Pcbp3 PE=1 SV=1	16.06	45.45	8	0.725789	0.246787	12.05	39.81	7	0.21815	0	12.92	42.32	8	0.524495	0.527583	0.489478	0.255625
tr|A0A0G2K8E7|A0A0G2K8E7_RAT	Gdpd1	Lysophospholipase D GDPD1 OS=Rattus norvegicus GN=Gdpd1 PE=1 SV=1	6.3	29.52	3	0.548735	0.0744784	8.35	28.57	4	0.513071	0.0725707	5.69	42.86	3	0.489739	0.0519466	0.517182	0.0297117
sp|O35180|SH3G3_RAT	Sh3gl3	Endophilin-A3 OS=Rattus norvegicus GN=Sh3gl3 PE=1 SV=2	6.81	26.51	4	0.480147	0.421888	8.68	36.31	4	0.671565	0.479291	8.68	31.7	5	0.43718	0.178754	0.529631	0.124782
sp|F1LRS8|CD2AP_RAT	Cd2ap	CD2-associated protein OS=Rattus norvegicus GN=Cd2ap PE=1 SV=2	7.01	27.94	4	0.502206	0.160028	4.56	29.36	2	0.615973	0.403164	4.8	31.87	3	0.480104	0.428975	0.532761	0.0729059
tr|F2Z3T9|F2Z3T9_RAT	U2af2	U2 snRNP auxiliary factor large subunit OS=Rattus norvegicus GN=U2af2 PE=1 SV=2	5.18	21.23	3	0.536294	0.359014	5	15.5	3	0.434449	0.413108	6.06	16.14	3	0.650632	0.572003	0.540458	0.108152
sp|P02454|CO1A1_RAT	Col1a1	Collagen alpha-1(I) chain OS=Rattus norvegicus GN=Col1a1 PE=1 SV=5	17.55	39.09	9	0.444574	0.143952	13.74	31.31	7	0.784554	0.672003	12.37	29.32	7	0.420218	0.19433	0.549782	0.203683
tr|G3V9P7|G3V9P7_RAT	Htt	Huntingtin OS=Rattus norvegicus GN=Htt PE=1 SV=1	9.61	16.09	6	0.6843	0.0677575	6.06	15.06	5	0.149142	0	7.39	16.83	6	0.820724	0.54382	0.551389	0.354972
sp|Q9Z269|VAPB_RAT	Vapb	Vesicle-associated membrane protein-associated protein B OS=Rattus norvegicus GN=Vapb PE=1 SV=3	17.23	44.44	10	0.689279	0.460054	15.93	45.27	11	0.533801	0.127127	18.1	55.97	10	0.43695	0.149561	0.553343	0.127295
tr|A0A0G2K943|A0A0G2K943_RAT	Ap2a2	AP-2 complex subunit alpha OS=Rattus norvegicus GN=Ap2a2 PE=1 SV=1	62.28	45.36	30	0.467735	0	64.22	46.89	31	0.291188	0	66.49	56.61	33	0.921151	0.580697	0.560025	0.324964
tr|M0R5H1|M0R5H1_RAT	Etl4	Enhancer trap locus 4 OS=Rattus norvegicus GN=Etl4 PE=1 SV=2	5.85	24.82	3	0.319012	0.0420729	11.58	24.72	7	0.704695	0.255462	14.71	32.23	8	0.69008	0.302672	0.571262	0.218577
tr|A0A0G2KB85|A0A0G2KB85_RAT	LOC299282	Serine protease inhibitor OS=Rattus norvegicus GN=LOC299282 PE=1 SV=1	13.63	34.88	7	0.360342	0.1117	13.32	41.86	7	0.82124	0.639932	11.44	40.7	6	0.541737	0.403025	0.57444	0.232183
tr|A0A0G2K988|A0A0G2K988_RAT	Daam2	Dishevelled-associated activator of morphogenesis 2 OS=Rattus norvegicus GN=Daam2 PE=1 SV=1	9.64	27.84	5	0.512575	0.268359	4.12	24.8	2	0.55701	0.490026	3.96	29.81	3	0.663149	0.846803	0.577578	0.0773653
tr|A0A0G2JVP5|A0A0G2JVP5_RAT	Paip1	Poly(A)-binding protein-interacting protein 1 OS=Rattus norvegicus GN=Paip1 PE=1 SV=1	7.72	26.75	4	0.70953	0.246505	4.66	22	3	0.534708	0.512974	8.03	23.25	4	0.505348	0.342874	0.583195	0.110389
tr|F1M4I1|F1M4I1_RAT	Ctnna3	Catenin alpha 3 OS=Rattus norvegicus GN=Ctnna3 PE=1 SV=3	8.08	37.06	4	0.444292	0.350568	6.54	34.86	3	0.722902	0.529773	10.69	36.51	5	0.586637	0.274267	0.58461	0.139316
tr|D3ZGN0|D3ZGN0_RAT	Tbc1d4	TBC1 domain family, member 4 OS=Rattus norvegicus GN=Tbc1d4 PE=1 SV=3	6.02	18.64	3	0.591909	0.316809	4.06	25.97	2	0.468152	0	6.04	21.39	3	0.694444	0	0.584835	0.113312
tr|B2RZ77|B2RZ77_RAT	Dpt	Dermatopontin OS=Rattus norvegicus GN=Dpt PE=1 SV=1	4.53	37.13	3	0.612276	0.0307679	6	41.58	3	0.620518	0.139137	5.11	22.77	3	0.524725	0	0.58584	0.0530871
sp|Q6MGB5|DHB8_RAT	Hsd17b8	Estradiol 17-beta-dehydrogenase 8 OS=Rattus norvegicus GN=Hsd17b8 PE=1 SV=1	4.97	41.7	3	0.890938	0.842235	9.12	57.92	5	0.321481	0	3.74	22.39	2	0.564637	0.224888	0.592352	0.285739
tr|D3ZUL3|D3ZUL3_RAT	Col6a1	Collagen type VI alpha 1 chain OS=Rattus norvegicus GN=Col6a1 PE=1 SV=1	12.38	23.12	7	0.625367	0.177687	7.14	20.39	4	0.646391	0.605445	7.36	21.07	4	0.507936	0.0266685	0.593231	0.0746123
tr|A0A0G2JT30|A0A0G2JT30_RAT	Mat2b	Methionine adenosyltransferase 2 subunit beta OS=Rattus norvegicus GN=Mat2b PE=1 SV=1	4.66	52.32	3	0.79619	0.313358	6.04	34.98	3	0.727197	0.390252	4.03	33.44	2	0.265814	0	0.5964	0.288367
tr|F1LRL4|F1LRL4_RAT	Tbc1d9b	Similar to TBC1 domain family, member 8; BUB2-like protein 1; vascular Rab-GAP/TBC-containing (Predicted), isoform CRA_a OS=Rattus norvegicus GN=Tbc1d9b PE=1 SV=2	7.03	22.11	6	0.724386	0.40864	6.39	22.9	3	0.663769	0.273753	7.06	17.51	4	0.402437	0.371497	0.596864	0.171085
tr|B4F774|B4F774_RAT	Gdap1l1	Ganglioside-induced differentiation-associated protein 1-like 1 OS=Rattus norvegicus GN=Gdap1l1 PE=2 SV=1	8.24	33.33	4	0.622893	0.247742	12.12	36.89	6	0.652467	0.0869224	10.09	34.7	5	0.51761	0.109848	0.597657	0.0708817
tr|D4AE88|D4AE88_RAT	Fam120b	Family with sequence similarity 120B OS=Rattus norvegicus GN=Fam120b PE=1 SV=1	3.23	25.73	2	0.388313	0	8.63	21.27	4	0.771064	0.0354489	7.29	16.82	5	0.646471	0.0991322	0.601949	0.195221
tr|Q7TP42|Q7TP42_RAT	Sec62	Ab2-292 OS=Rattus norvegicus GN=Sec62 PE=1 SV=1	3.2	31.24	3	0.667569	0.302357	4.22	22.64	3	0.67123	0.255927	2.87	11.24	2	0.491541	0.354191	0.610113	0.102703
tr|A0A0G2K0Y6|A0A0G2K0Y6_RAT	Yap1	Transcriptional coactivator YAP1 OS=Rattus norvegicus GN=Yap1 PE=1 SV=1	4.02	19.39	2	0.689725	0.341774	4.05	14.25	2	0.64766	0.580315	2.81	28.5	3	0.501768	0.407064	0.613051	0.0986424
tr|F1MAA1|F1MAA1_RAT	Usp47	Ubiquitin-specific peptidase 47 OS=Rattus norvegicus GN=Usp47 PE=1 SV=1	8.32	15.79	6	0.507463	0.134276	7.68	23.17	4	0.645161	0.103269	10.5	20	6	0.691005	0.26633	0.614543	0.095525
sp|Q920P6|ADA_RAT	Ada	Adenosine deaminase OS=Rattus norvegicus GN=Ada PE=1 SV=3	6.73	32.67	4	0.594422	0.232983	5.48	31.82	3	0.817062	0.60435	5	18.75	3	0.441213	0.388879	0.617566	0.18899
tr|D3ZDE4|D3ZDE4_RAT	Dguok	Deoxyguanosine kinase OS=Rattus norvegicus GN=Dguok PE=1 SV=1	3.15	50.72	2	0.63761	0.316748	2.67	46.4	2	0.53415	0.643984	2.52	49.28	2	0.686955	0.647016	0.619572	0.0779831
sp|P97519|HMGCL_RAT	Hmgcl	Hydroxymethylglutaryl-CoA lyase, mitochondrial OS=Rattus norvegicus GN=Hmgcl PE=2 SV=1	6.12	34.77	3	0.73643	0.396358	6.31	42.15	3	0.498726	0.537397	6.25	28.31	4	0.627978	0.809666	0.621045	0.119003
sp|P50411|IPP2_RAT	Ppp1r2	Protein phosphatase inhibitor 2 OS=Rattus norvegicus GN=Ppp1r2 PE=1 SV=2	7.48	45.85	5	0.472207	0.139676	6.05	43.41	3	0.706448	0.420363	3.1	26.34	2	0.714831	0.428383	0.631162	0.137723
tr|B2GV72|B2GV72_RAT	Cbr3	Carbonyl reductase 3 OS=Rattus norvegicus GN=Cbr3 PE=1 SV=1	4.36	38.99	2	0.667934	0	5.08	29.96	3	0.72031	0.677724	4.6	29.6	3	0.511008	0.769615	0.633084	0.108917
tr|M0R735|M0R735_RAT	Syncrip	Heterogeneous nuclear ribonucleoprotein Q OS=Rattus norvegicus GN=Syncrip PE=1 SV=2	7.01	34.16	3	0.494188	0.205237	6.45	33.99	3	0.657285	0	12.14	41.1	6	0.754161	0.233516	0.635211	0.131384
tr|D3ZES7|D3ZES7_RAT	Plxna4	Plexin A4 OS=Rattus norvegicus GN=Plxna4 PE=4 SV=1	6.74	15	4	0.675072	0.921779	10.18	22.56	6	0.667781	0.292779	7.32	18.7	5	0.586518	0.342043	0.643124	0.0491571
tr|D4A927|D4A927_RAT	Tacc1	Transforming, acidic coiled-coil-containing protein 1 OS=Rattus norvegicus GN=Tacc1 PE=1 SV=1	6.94	26.04	4	0.627972	0.207365	6.03	22.28	4	0.738937	0.417004	6.91	20.21	4	0.577345	0.547574	0.648085	0.0826523
tr|D3ZDU2|D3ZDU2_RAT	Rptor	Regulatory-associated protein of MTOR, complex 1 OS=Rattus norvegicus GN=Rptor PE=1 SV=2	6	15.88	3	0.804265	0.675758	7.9	16.25	4	0.834018	0.406648	5.6	19.33	3	0.312165	0.0395289	0.650149	0.293081
sp|Q62829|PAK3_RAT	Pak3	Serine/threonine-protein kinase PAK 3 OS=Rattus norvegicus GN=Pak3 PE=1 SV=1	20.1	38.24	9	0.713808	0.278652	30.63	38.79	16	0.620432	0.32069	29.11	44.67	15	0.617184	0.0502342	0.650475	0.0548721
tr|D3ZK56|D3ZK56_RAT	Rap2c	RAP2C, member of RAS oncogene family OS=Rattus norvegicus GN=Rap2c PE=1 SV=2	4.03	33.33	2	0.746263	0	4	17.49	2	0.644674	0	3.28	20.22	2	0.580736	0	0.657224	0.0834742
tr|F1LNH3|F1LNH3_RAT	Col6a2	Collagen type VI alpha 2 chain OS=Rattus norvegicus GN=Col6a2 PE=1 SV=2	5.36	29.11	3	0.700637	0.38485	5.68	26.1	4	0.656996	0.171629	4.61	27.46	3	0.615353	0.403381	0.657662	0.0426461
tr|A0A0G2JUS7|A0A0G2JUS7_RAT	Tmem11	Transmembrane protein 11, mitochondrial OS=Rattus norvegicus GN=Tmem11 PE=1 SV=1	2.87	18.75	2	0.692079	0.224808	3.17	31.82	2	0.674291	0.352858	3.89	18.75	3	0.607144	0.31482	0.657838	0.0447942
sp|Q5RJY4|DRS7B_RAT	Dhrs7b	Dehydrogenase/reductase SDR family member 7B OS=Rattus norvegicus GN=Dhrs7b PE=1 SV=1	3.35	29.85	3	0.966835	0.81974	8.19	31.38	4	0.478555	0.201564	6.52	31.69	3	0.532485	0.362623	0.659292	0.267702
sp|Q5PQN7|LZIC_RAT	Lzic	Protein LZIC OS=Rattus norvegicus GN=Lzic PE=2 SV=1	6.3	32.63	3	0.676942	0.426872	7.15	41.58	5	0.671273	0.157698	5.71	40	3	0.634385	0.461258	0.660867	0.0231084
sp|P0DMW1|HS71B_RAT	Hspa1b	Heat shock 70 kDa protein 1B OS=Rattus norvegicus GN=Hspa1b PE=2 SV=1	17.26	44.77	8	0.566892	0.21657	21.53	43.53	10	0.544034	0.13223	21.7	46.18	11	0.879387	0.690458	0.663437	0.187367
tr|A0A0G2K5E8|A0A0G2K5E8_RAT	NEWGENE_621351	Collagen, type I, alpha 2 OS=Rattus norvegicus GN=NEWGENE_621351 PE=1 SV=1	7.14	36.42	4	0.754865	0.546771	6.11	43.25	3	0.615095	0.0208125	3.62	38.38	3	0.623048	0.737424	0.664336	0.0785014
tr|D3ZUC9|D3ZUC9_RAT	Oxsr1	Oxidative-stress responsive 1 (Predicted) OS=Rattus norvegicus GN=Oxsr1 PE=1 SV=1	15.37	25.24	8	0.575751	0.303157	11.21	31.88	6	0.539973	0.428789	13.07	20.3	8	0.878829	0.877177	0.664851	0.186172
tr|F1M6V8|F1M6V8_RAT	Strn4	Striatin 4 OS=Rattus norvegicus GN=Strn4 PE=1 SV=1	3.71	18.84	3	0.867812	0.722187	2.61	12.52	2	0.261147	0	4.04	20.82	2	0.868862	0.390122	0.66594	0.350562
tr|F1LMT8|F1LMT8_RAT	Rab3gap2	Rab3 GTPase-activating protein non-catalytic subunit OS=Rattus norvegicus GN=Rab3gap2 PE=1 SV=3	11.84	18.21	6	0.934355	0.589245	10.89	20.12	7	0.525112	0.110686	6.73	14.17	4	0.54065	0.107187	0.666706	0.231922
tr|F1M6A8|F1M6A8_RAT	Akt3	RAC-gamma serine/threonine-protein kinase OS=Rattus norvegicus GN=Akt3 PE=3 SV=3	2.82	44.69	2	0.523881	0	5.79	32.3	4	0.594738	0.338843	5.34	41.59	3	0.885414	0.635888	0.668011	0.191581
tr|F1LRY5|F1LRY5_RAT	Sardh	RCG45398 OS=Rattus norvegicus GN=Sardh PE=1 SV=2	6.7	19.48	4	0.533808	0.32073	8.36	17.52	4	0.60661	0.399858	6.52	14.36	3	0.863671	0.589917	0.66803	0.173296
sp|Q7TT47|SPG7_RAT	Spg7	Paraplegin OS=Rattus norvegicus GN=Spg7 PE=2 SV=2	2.92	26.5	2	1.72172	0.124859	7.74	31.75	4	1.43843	0.539516	2.81	32.39	2	1.3519	0.38803	1.50402	0.193437
tr|B2RZB6|B2RZB6_RAT	Lsm8	LSM8 homolog, U6 small nuclear RNA associated (S. cerevisiae) OS=Rattus norvegicus GN=Lsm8 PE=1 SV=1	5.32	55.21	3	1.4656	0.197456	4.87	43.75	3	1.10905	0.749434	3.06	43.75	2	1.9748	0.271223	1.51648	0.435112
sp|P12839|NFM_RAT	Nefm	Neurofilament medium polypeptide OS=Rattus norvegicus GN=Nefm PE=1 SV=4	114.07	68.68	60	1.51948	0.00173887	113.25	68.2	59	1.61358	1.21513e-15	112.97	70.21	58	1.43137	1.98536e-10	1.52148	0.0911194
sp|Q505J8|SYFA_RAT	Farsa	Phenylalanine--tRNA ligase alpha subunit OS=Rattus norvegicus GN=Farsa PE=1 SV=1	8.37	34.84	5	1.4637	0.8487	12.77	41.34	6	1.35918	0.553085	18.34	45.28	9	1.74779	0.123307	1.52356	0.201102
sp|P19527|NFL_RAT	Nefl	Neurofilament light polypeptide OS=Rattus norvegicus GN=Nefl PE=1 SV=3	84.06	70.66	41	1.57758	3.47735e-10	92.92	70.3	47	1.65114	5.32509e-12	89.44	72.51	47	1.37721	1.82037e-05	1.53531	0.141774
sp|Q68FS1|NUBP2_RAT	Nubp2	Cytosolic Fe-S cluster assembly factor NUBP2 OS=Rattus norvegicus GN=Nubp2 PE=1 SV=1	7.96	21.03	4	1.33283	0.845854	6.43	24.72	3	1.13051	0.449907	4.01	19.19	2	2.17349	0.820287	1.54561	0.553089
sp|Q03555|GEPH_RAT	Gphn	Gephyrin OS=Rattus norvegicus GN=Gphn PE=1 SV=3	23.74	37.5	13	1.45931	0.441334	24.63	37.89	12	1.6253	0.278818	22.21	40.36	11	1.56678	0.391537	1.55046	0.0841897
tr|A0A0H2UH99|A0A0H2UH99_RAT	Rpl24	60S ribosomal protein L24 OS=Rattus norvegicus GN=Rpl24 PE=1 SV=1	4.4	43.59	3	1.28952	0.062899	4.37	32.05	2	1.65787	0.0568903	4.74	48.08	3	1.73281	0.0262269	1.56007	0.237281
tr|F1LPW0|F1LPW0_RAT	Ighm	Immunoglobulin heavy constant mu OS=Rattus norvegicus GN=Ighm PE=1 SV=1	12.29	28.89	6	1.2448	0.660721	13.62	30.71	7	1.35125	0.626498	13.81	30.1	7	2.15339	0.203358	1.58314	0.496708
tr|D3ZAI6|D3ZAI6_RAT	Nt5dc3	5'-nucleotidase domain-containing 3 OS=Rattus norvegicus GN=Nt5dc3 PE=1 SV=2	6.07	36.45	3	1.27238	0.380503	13.74	35.35	7	1.21934	0.264494	6.73	28.39	3	2.25865	0.158984	1.58346	0.585337
tr|D4ACJ1|D4ACJ1_RAT	LOC100363469	40S ribosomal protein S24 OS=Rattus norvegicus GN=LOC100363469 PE=3 SV=1	4	39.1	2	1.11674	0.483396	6.04	30.83	3	1.66614	0.213236	4.02	38.35	2	2.02851	0.170598	1.6038	0.459069
tr|D3ZX87|D3ZX87_RAT	LOC100910017	60S ribosomal protein L31-like OS=Rattus norvegicus GN=LOC100910017 PE=4 SV=2	4.03	54.55	2	1.09313	0.463396	4.03	37.76	2	1.77213	0.115443	4.4	45.45	2	1.9536	0.106525	1.60629	0.453578
sp|P62804|H4_RAT	Hist1h4b	Histone H4 OS=Rattus norvegicus GN=Hist1h4b PE=1 SV=2	14.54	59.22	8	2.09577	7.86974e-05	14.59	65.05	7	1.38518	0.0146009	14.15	54.37	7	1.36534	0.0100306	1.61543	0.416103
tr|F1LMV9|F1LMV9_RAT	Coro2b	Coronin OS=Rattus norvegicus GN=Coro2b PE=3 SV=3	5.14	22.08	4	1.79226	0.425798	3.04	24.58	3	1.87664	0.280813	1.8	38.33	3	1.32595	0.699412	1.66495	0.296597
sp|Q794E4|HNRPF_RAT	Hnrnpf	Heterogeneous nuclear ribonucleoprotein F OS=Rattus norvegicus GN=Hnrnpf PE=1 SV=3	16.22	44.1	8	1.95751	0.221206	12.03	34.22	6	1.16941	0.153995	12.99	38.55	6	1.87934	0.348095	1.66876	0.434205
sp|P70470|LYPA1_RAT	Lypla1	Acyl-protein thioesterase 1 OS=Rattus norvegicus GN=Lypla1 PE=1 SV=1	6.03	24.78	3	1.2413	0.282099	6.85	41.3	4	1.85445	0.143603	5.75	41.3	3	1.93982	0.325558	1.67852	0.381041
tr|M0R7D1|M0R7D1_RAT	Larp7	La-related protein 7 OS=Rattus norvegicus GN=Larp7 PE=1 SV=2	4	32.63	2	1.5923	0	3.23	27.72	2	1.78702	0.278415	4.03	44.91	2	1.71699	0.270493	1.69877	0.0986326
sp|P54001|P4HA1_RAT	P4ha1	Prolyl 4-hydroxylase subunit alpha-1 OS=Rattus norvegicus GN=P4ha1 PE=2 SV=2	6.08	22.28	4	2.18282	0.442217	3.91	19.85	2	1.49244	0.244889	3.51	33.71	2	1.49486	0.497998	1.72337	0.397892
tr|F1LRZ7|F1LRZ7_RAT	Nefh	Neurofilament heavy polypeptide OS=Rattus norvegicus GN=Nefh PE=1 SV=1	82.56	61.75	40	1.57165	2.76715e-05	99.16	62.5	49	2.21345	0.153178	94.88	62.97	48	1.44862	1.58187e-05	1.74457	0.410693
sp|Q8VID1|DHRS4_RAT	Dhrs4	Dehydrogenase/reductase SDR family member 4 OS=Rattus norvegicus GN=Dhrs4 PE=2 SV=2	3.71	18.64	3	1.91855	0.403699	6.07	21.51	3	1.75369	0.292501	6.28	32.62	4	1.62591	0.456157	1.76605	0.146707
tr|D3ZC89|D3ZC89_RAT	Fam114a2	Family with sequence similarity 114, member A2 OS=Rattus norvegicus GN=Fam114a2 PE=1 SV=3	5.79	24.25	3	1.6445	0.217806	7.38	24.05	4	1.53446	0.675302	5.88	19.84	3	2.13834	0.697828	1.77243	0.321622
tr|A0A0H2UHW4|A0A0H2UHW4_RAT	Pcnp	PEST proteolytic signal-containing nuclear protein OS=Rattus norvegicus GN=Pcnp PE=1 SV=1	4.48	30.32	2	1.15717	0.496188	3.83	55.32	2	2.29118	0.285911	4.04	42.55	2	2.01108	0.419208	1.81981	0.590708
sp|Q01129|PGS2_RAT	Dcn	Decorin OS=Rattus norvegicus GN=Dcn PE=1 SV=1	16.12	34.46	9	1.36586	0.0674456	15.27	40.11	8	1.28828	0.076215	15.29	44.92	7	2.9333	6.38529e-06	1.86248	0.928164
sp|Q5M7T9|THNS2_RAT	Thnsl2	Threonine synthase-like 2 OS=Rattus norvegicus GN=Thnsl2 PE=2 SV=1	3.23	13.2	2	2.0038	0.26084	3.7	29.48	3	2.01148	0	2.99	14.23	3	1.57954	0	1.86494	0.247196
tr|A0A0G2K2T6|A0A0G2K2T6_RAT	Ilf3	Interleukin enhancer-binding factor 3 OS=Rattus norvegicus GN=Ilf3 PE=1 SV=1	6.61	19.96	4	1.46834	0.546653	6.05	22.63	3	2.17957	0.345381	8.78	23.41	5	2.51024	0.330848	2.05271	0.532408
tr|Q5XIH1|Q5XIH1_RAT	Aspn	Asporin OS=Rattus norvegicus GN=Aspn PE=1 SV=1	10.22	28.8	5	1.6906	0.129633	9.11	29.33	5	1.53983	0.115285	7.08	38.93	4	3.13783	0.0005094	2.12275	0.882307
tr|F1MAA7|F1MAA7_RAT	Lamc1	Laminin subunit gamma 1 OS=Rattus norvegicus GN=Lamc1 PE=1 SV=1	8.73	22.15	4	1.43554	0.362889	13.73	21.53	7	1.36556	0.233747	11.41	26.01	7	3.88875	0.0908986	2.22995	1.43699
tr|D4AA35|D4AA35_RAT	Asmtl	Acetylserotonin O-methyltransferase-like OS=Rattus norvegicus GN=Asmtl PE=1 SV=2	4.27	26.11	3	3.90818	0.360247	6.22	30.53	4	1.14278	0.691725	7.68	31.42	4	1.96619	0.383528	2.33905	1.4199
sp|Q505J6|GHC2_RAT	Slc25a18	Mitochondrial glutamate carrier 2 OS=Rattus norvegicus GN=Slc25a18 PE=2 SV=2	9.12	30.94	5	2.50252	0.234313	11.57	41.25	7	1.84349	0.183608	10.24	33.44	6	4.54784	0.243876	2.96462	1.41015
sp|Q71RJ2|CCG2_RAT	Cacng2	Voltage-dependent calcium channel gamma-2 subunit OS=Rattus norvegicus GN=Cacng2 PE=1 SV=1	4.02	36.53	2	1.30411	0	4.15	35.6	2	5.72806	0.159737	3.48	41.8	2	3.66455	0.487371	3.56557	2.21363
tr|B2GVB9|B2GVB9_RAT	Fermt3	Fermitin family member 3 OS=Rattus norvegicus GN=Fermt3 PE=1 SV=1	2.93	18.95	2	4.9335	0.441913	2.52	19.25	2	5.52246	0.4822	8.25	27.97	4	1.35747	0.709704	3.93781	2.25396
tr|A0A1P0PBZ6|A0A1P0PBZ6_RAT	Trio	Triple functional domain protein OS=Rattus norvegicus GN=Trio PE=1 SV=1	3.07	17.36	3	6.28902	0.246581	3.58	18.28	5	92.3568	0	3.76	16.67	5	10.9768	0.296378	36.5409	48.3948
tr|F1LUM5|F1LUM5_RAT	Tubal3	Tubulin alpha chain OS=Rattus norvegicus GN=Tubal3 PE=1 SV=2	11.38	37.7	6	91.6889	0	13.57	37.43	7	22.3672	0	13.21	35.86	7	92.8699	0	68.9753	40.3681
